# Supplementary material for: Modeling Drug Resistance Emergence and Transmission in HIV-1 in the UK
Source: MDPI journal article supplement (doi:10.3390/v15061244), 2023-05-25
Supplement: s1 [file s1]

# Supplementary Materials: Modelling drug resistance emergence and transmission in HIV-1 in the UK

Anna Zhukova <sup>1\*</sup> , David Dunn <sup>2</sup>, Olivier Gascuel <sup>3\*</sup> , on behalf of the UK HIV Drug Resistance Database & the Collaborative HIV, Anti-HIV Drug Resistance Network

## 1. Resistance statistics over time by DRM

### 1.1. Subtype B

**Table S1.** DRMs with prevalence > 0.5% found in position PR:I54 in B data set, and the evolution of their presence over time.

| date     | total<br>samples | DRM | resistant cases |                                      |            | TDR                          |                            |     | ADR                          | loss                         |
|----------|------------------|-----|-----------------|--------------------------------------|------------|------------------------------|----------------------------|-----|------------------------------|------------------------------|
|          |                  |     | (% of all)      | treatment-<br>experienced      naive |            | cases<br>(% of<br>resistant) | cluster<br>num.      sizes |     | cases<br>(% of<br>resistant) | cases<br>(% of<br>resistant) |
|          |                  |     |                 | (% of resistant)                     |            |                              |                            |     |                              |                              |
| 14-03-16 | 39159            | V   | 243 (0.6%)      | 182 (74.9%)                          | 33 (13.6%) | 62.52 (25.7%)                | 43                         | 1-6 | 191.48 (78.8%)               | 11 (4.5%)                    |
| 17-12-11 | 28011            | V   | 231 (0.8%)      | 177 (76.6%)                          | 27 (11.7%) | 55.02 (23.8%)                | 39                         | 1-6 | 184.98 (80.1%)               | 9 (3.9%)                     |
| 17-12-06 | 13280            | V   | 190 (1.4%)      | 152 (80.0%)                          | 20 (10.5%) | 36.12 (19.0%)                | 29                         | 1-3 | 158.88 (83.6%)               | 5 (2.6%)                     |
| 17-12-01 | 3195             | V   | 82 (2.6%)       | 74 (90.2%)                           | 4 (4.9%)   | 6.00 (7.3%)                  | 6                          | 1-1 | 76.00 (92.7%)                |                              |
| 14-11-96 | 7                | V   |                 |                                      |            |                              |                            |     |                              |                              |

**Table S2.** DRMs with prevalence > 0.5% found in position PR:L33 in B data set, and the evolution of their presence over time.

| date     | total<br>samples | DRM | resistant cases |                                      |            | TDR                          |                            |      | ADR                          | loss                         |
|----------|------------------|-----|-----------------|--------------------------------------|------------|------------------------------|----------------------------|------|------------------------------|------------------------------|
|          |                  |     | (% of all)      | treatment-<br>experienced      naive |            | cases<br>(% of<br>resistant) | cluster<br>num.      sizes |      | cases<br>(% of<br>resistant) | cases<br>(% of<br>resistant) |
|          |                  |     |                 | (% of resistant)                     |            |                              |                            |      |                              |                              |
| 14-03-16 | 39159            | F   | 230 (0.6%)      | 117 (50.9%)                          | 92 (40.0%) | 126.12 (54.8%)               | 70                         | 1-10 | 114.88 (49.9%)               | 11 (4.8%)                    |
| 17-12-11 | 28011            | F   | 191 (0.7%)      | 104 (54.5%)                          | 71 (37.2%) | 95.75 (50.1%)                | 53.5                       | 1-9  | 102.25 (53.5%)               | 7 (3.7%)                     |
| 17-12-06 | 13280            | F   | 111 (0.8%)      | 72 (64.9%)                           | 28 (25.2%) | 38.50 (34.7%)                | 27.5                       | 1-5  | 76.50 (68.9%)                | 4 (3.6%)                     |
| 17-12-01 | 3195             | F   | 26 (0.8%)       | 22 (84.6%)                           | 2 (7.7%)   | 3.00 (11.5%)                 | 3                          | 1-1  | 23.00 (88.5%)                |                              |
| 14-11-96 | 7                | F   |                 |                                      |            |                              |                            |      |                              |                              |

**Table S3.** DRMs with prevalence > 0.5% found in position PR:L90 in B data set, and the evolution of their presence over time.

| date     | total<br>samples | DRM | resistant cases |                                      |             | TDR                          |                            |                              | ADR                          | loss      |
|----------|------------------|-----|-----------------|--------------------------------------|-------------|------------------------------|----------------------------|------------------------------|------------------------------|-----------|
|          |                  |     | ( % of all)     | treatment-<br>experienced      naive |             | cases<br>(% of<br>resistant) | cluster<br>num.      sizes | cases<br>(% of<br>resistant) | cases<br>(% of<br>resistant) |           |
|          |                  |     |                 | ( % of resistant)                    |             |                              |                            |                              |                              |           |
| 14-03-16 | 39159            | M   | 849 (2.2%)      | 480 (56.5%)                          | 289 (34.0%) | 460.77 (54.3%)               | 128                        | 1-114                        | 450.23 (53.0%)               | 62 (7.3%) |
| 17-12-11 | 28011            | M   | 709 (2.5%)      | 449 (63.3%)                          | 196 (27.6%) | 318.52 (44.9%)               | 109                        | 1-71                         | 435.48 (61.4%)               | 45 (6.3%) |
| 17-12-06 | 13280            | M   | 513 (3.9%)      | 390 (76.0%)                          | 88 (17.2%)  | 137.62 (26.8%)               | 81                         | 1-25                         | 386.38 (75.3%)               | 11 (2.1%) |
| 17-12-01 | 3195             | M   | 206 (6.4%)      | 178 (86.4%)                          | 16 (7.8%)   | 25.00 (12.1%)                | 20                         | 1-5                          | 182.00 (88.3%)               | 1 (0.5%)  |
| 14-11-96 | 7                | M   |                 |                                      |             |                              |                            |                              |                              |           |

**Table S4.** DRMs with prevalence  $> 0.5\%$  found in position PR:M46 in B data set, and the evolution of their presence over time.

| date     | total samples | DRM | resistant cases |                                        |                        | TDR                    |       |               | ADR cases (% of resistant) | loss cases (% of resistant) |
|----------|---------------|-----|-----------------|----------------------------------------|------------------------|------------------------|-------|---------------|----------------------------|-----------------------------|
|          |               |     | (% of all)      | treatment-experienced (% of resistant) | naive (% of resistant) | cases (% of resistant) | num.  | cluster sizes |                            |                             |
| 14-03-16 | 39159         | I   | 378 (1.0%)      | 246 (65.1%)                            | 97 (25.7%)             | 140.39 (37.1%)         | 108.5 | 1-6           | 250.61 (66.3%)             | 13 (3.4%)                   |
| 17-12-11 | 28011         | I   | 324 (1.2%)      | 232 (71.6%)                            | 65 (20.1%)             | 95.52 (29.5%)          | 75.5  | 1-6           | 235.48 (72.7%)             | 7 (2.2%)                    |
| 17-12-06 | 13280         | I   | 238 (1.8%)      | 191 (80.3%)                            | 30 (12.6%)             | 48.12 (20.2%)          | 41    | 1-4           | 194.88 (81.9%)             | 5 (2.1%)                    |
| 17-12-01 | 3195          | I   | 101 (3.2%)      | 91 (90.1%)                             | 6 (5.9%)               | 8.00 (7.9%)            | 8     | 1-1           | 93.00 (92.1%)              |                             |
| 14-11-96 | 7             | I   | 1 (14.3%)       | 1 (100.0%)                             |                        |                        |       |               | 1.00 (100.0%)              |                             |

**Table S5.** DRMs with prevalence  $> 0.5\%$  found in position PR:V82 in B data set, and the evolution of their presence over time.

| date     | total samples | DRM | resistant cases |                                        |                        | TDR                    |      |               | ADR cases (% of resistant) | loss cases (% of resistant) |
|----------|---------------|-----|-----------------|----------------------------------------|------------------------|------------------------|------|---------------|----------------------------|-----------------------------|
|          |               |     | (% of all)      | treatment-experienced (% of resistant) | naive (% of resistant) | cases (% of resistant) | num. | cluster sizes |                            |                             |
| 14-03-16 | 39159         | A   | 295 (0.8%)      | 216 (73.2%)                            | 51 (17.3%)             | 88.02 (29.8%)          | 53   | 1-11          | 218.98 (74.2%)             | 12 (4.1%)                   |
| 17-12-11 | 28011         | A   | 276 (1.0%)      | 210 (76.1%)                            | 42 (15.2%)             | 74.52 (27.0%)          | 48   | 1-10          | 212.48 (77.0%)             | 11 (4.0%)                   |
| 17-12-06 | 13280         | A   | 220 (1.7%)      | 179 (81.4%)                            | 25 (11.4%)             | 42.12 (19.1%)          | 33   | 1-3           | 183.88 (83.6%)             | 6 (2.7%)                    |
| 17-12-01 | 3195          | A   | 99 (3.1%)       | 92 (92.9%)                             | 3 (3.0%)               | 6.00 (6.1%)            | 6    | 1-2           | 93.00 (93.9%)              |                             |
| 14-11-96 | 7             | A   |                 |                                        |                        |                        |      |               |                            |                             |

**Table S6.** DRMs with prevalence  $> 0.5\%$  found in position RT:A62 in B data set, and the evolution of their presence over time.

| date     | total samples | DRM | resistant cases |                                        |                        | TDR                    |      |               | ADR cases (% of resistant) | loss cases (% of resistant) |
|----------|---------------|-----|-----------------|----------------------------------------|------------------------|------------------------|------|---------------|----------------------------|-----------------------------|
|          |               |     | (% of all)      | treatment-experienced (% of resistant) | naive (% of resistant) | cases (% of resistant) | num. | cluster sizes |                            |                             |
| 14-03-16 | 39159         | V   | 251 (0.6%)      | 147 (58.6%)                            | 81 (32.3%)             | 114.50 (45.6%)         | 58.5 | 1-27          | 147.50 (58.8%)             | 11 (4.4%)                   |
| 17-12-11 | 28011         | V   | 208 (0.7%)      | 134 (64.4%)                            | 57 (27.4%)             | 80.00 (38.5%)          | 42   | 1-16          | 134.00 (64.4%)             | 6 (2.9%)                    |
| 17-12-06 | 13280         | V   | 136 (1.0%)      | 109 (80.1%)                            | 17 (12.5%)             | 28.50 (21.0%)          | 18.5 | 1-8           | 108.50 (79.8%)             | 1 (0.7%)                    |
| 17-12-01 | 3195          | V   | 55 (1.7%)       | 45 (81.8%)                             | 6 (10.9%)              | 11.00 (20.0%)          | 8    | 1-4           | 44.00 (80.0%)              |                             |
| 14-11-96 | 7             | V   |                 |                                        |                        |                        |      |               |                            |                             |

## 1.2. Subtype C

**Table S7.** DRMs with prevalence > 0.5% found in position RT:D67 in B data set, and the evolution of their presence over time.

| date     | total samples | DRM | (%) of all  | resistant cases       |             | cases (% of resistant) | TDR   |               | ADR cases (% of resistant) | loss cases (% of resistant) |
|----------|---------------|-----|-------------|-----------------------|-------------|------------------------|-------|---------------|----------------------------|-----------------------------|
|          |               |     |             | treatment-experienced | naive       |                        | num.  | cluster sizes |                            |                             |
| 14-03-16 | 39159         | N   | 1035 (2.6%) | 806 (77.9%)           | 150 (14.5%) | 273.00 (26.4%)         | 170.5 | 1-21          | 794.00 (76.7%)             | 32 (3.1%)                   |
| 17-12-11 | 28011         | N   | 965 (3.4%)  | 772 (80.0%)           | 126 (13.1%) | 222.25 (23.0%)         | 144   | 1-20          | 766.75 (79.5%)             | 24 (2.5%)                   |
| 17-12-06 | 13280         | N   | 801 (6.0%)  | 670 (83.6%)           | 76 (9.5%)   | 139.50 (17.4%)         | 105.5 | 1-10          | 676.50 (84.5%)             | 15 (1.9%)                   |
| 17-12-01 | 3195          | N   | 364 (11.4%) | 329 (90.4%)           | 20 (5.5%)   | 32.50 (8.9%)           | 31.5  | 1-2           | 332.50 (91.3%)             | 1 (0.3%)                    |
| 14-11-96 | 7             | N   | 4 (57.1%)   | 4 (100.0%)            |             |                        |       |               | 4.00 (100.0%)              |                             |

**Table S8.** DRMs with prevalence > 0.5% found in position RT:E138 in B data set, and the evolution of their presence over time.

| date     | total samples | DRM | (%) of all | resistant cases       |             | cases (% of resistant) | TDR   |               | ADR cases (% of resistant) | loss cases (% of resistant) |
|----------|---------------|-----|------------|-----------------------|-------------|------------------------|-------|---------------|----------------------------|-----------------------------|
|          |               |     |            | treatment-experienced | naive       |                        | num.  | cluster sizes |                            |                             |
| 14-03-16 | 39159         | A   | 862 (2.2%) | 163 (18.9%)           | 637 (73.9%) | 760.25 (88.2%)         | 305.5 | 1-158         | 155.75 (18.1%)             | 54 (6.3%)                   |
| 17-12-11 | 28011         | A   | 582 (2.1%) | 124 (21.3%)           | 428 (73.5%) | 485.75 (83.5%)         | 226   | 1-89          | 122.25 (21.0%)             | 26 (4.5%)                   |
| 17-12-06 | 13280         | A   | 239 (1.8%) | 87 (36.4%)            | 142 (59.4%) | 164.75 (68.9%)         | 107.5 | 1-14          | 84.25 (35.3%)              | 10 (4.2%)                   |
| 17-12-01 | 3195          | A   | 61 (1.9%)  | 31 (50.8%)            | 29 (47.5%)  | 33.50 (54.9%)          | 28.5  | 1-4           | 29.50 (48.4%)              | 2 (3.3%)                    |
| 14-11-96 | 7             | A   |            |                       |             |                        |       |               |                            |                             |

**Table S9.** DRMs with prevalence > 0.5% found in position RT:E44 in B data set, and the evolution of their presence over time.

| date     | total samples | DRM | (%) of all | resistant cases       |            | cases (% of resistant) | TDR  |               | ADR cases (% of resistant) | loss cases (% of resistant) |
|----------|---------------|-----|------------|-----------------------|------------|------------------------|------|---------------|----------------------------|-----------------------------|
|          |               |     |            | treatment-experienced | naive      |                        | num. | cluster sizes |                            |                             |
| 14-03-16 | 39159         | D   | 294 (0.8%) | 180 (61.2%)           | 93 (31.6%) | 129.62 (44.1%)         | 77   | 1-29          | 183.38 (62.4%)             | 19 (6.5%)                   |
| 17-12-11 | 28011         | D   | 249 (0.9%) | 170 (68.3%)           | 60 (24.1%) | 87.50 (35.1%)          | 58   | 1-9           | 176.50 (70.9%)             | 15 (6.0%)                   |
| 17-12-06 | 13280         | D   | 197 (1.5%) | 149 (75.6%)           | 31 (15.7%) | 49.75 (25.3%)          | 37.5 | 1-3           | 156.25 (79.3%)             | 9 (4.6%)                    |
| 17-12-01 | 3195          | D   | 79 (2.5%)  | 66 (83.5%)            | 7 (8.9%)   | 11.00 (13.9%)          | 10   | 1-2           | 70.00 (88.6%)              | 2 (2.5%)                    |
| 14-11-96 | 7             | D   | 1 (14.3%)  | 1 (100.0%)            |            |                        |      |               | 1.00 (100.0%)              |                             |

**Table S10.** DRMs with prevalence > 0.5% found in position RT:G190 in B data set, and the evolution of their presence over time.

| date     | total samples | DRM | (%) of all | resistant cases       |            | cases (% of resistant) | TDR  |               | ADR cases (% of resistant) | loss cases (% of resistant) |
|----------|---------------|-----|------------|-----------------------|------------|------------------------|------|---------------|----------------------------|-----------------------------|
|          |               |     |            | treatment-experienced | naive      |                        | num. | cluster sizes |                            |                             |
| 14-03-16 | 39159         | A   | 447 (1.1%) | 342 (76.5%)           | 68 (15.2%) | 117.25 (26.2%)         | 97   | 1-6           | 350.75 (78.5%)             | 21 (4.7%)                   |
| 17-12-11 | 28011         | A   | 395 (1.4%) | 312 (79.0%)           | 57 (14.4%) | 88.00 (22.3%)          | 77   | 1-4           | 319.00 (80.8%)             | 12 (3.0%)                   |
| 17-12-06 | 13280         | A   | 341 (2.6%) | 280 (82.1%)           | 38 (11.1%) | 60.00 (17.6%)          | 58   | 1-2           | 287.00 (84.2%)             | 6 (1.8%)                    |
| 17-12-01 | 3195          | A   | 99 (3.1%)  | 89 (89.9%)            | 6 (6.1%)   | 8.00 (8.1%)            | 8    | 1-2           | 91.00 (91.9%)              |                             |
| 14-11-96 | 7             | A   |            |                       |            |                        |      |               |                            |                             |

**Table S11.** DRMs with prevalence > 0.5% found in position RT:H221 in B data set, and the evolution of their presence over time.

| date     | total samples | DRM | (%) of all | resistant cases |                        | cases (% of resistant) | TDR  |       | ADR cases (% of resistant) | loss cases (% of resistant) |
|----------|---------------|-----|------------|-----------------|------------------------|------------------------|------|-------|----------------------------|-----------------------------|
|          |               |     |            | experienced     | naive (% of resistant) |                        | num. | sizes |                            |                             |
| 14-03-16 | 39159         | Y   | 475 (1.2%) | 269 (56.6%)     | 162 (34.1%)            | 220.00 (46.3%)         | 87   | 1-64  | 267.00 (56.2%)             | 12 (2.5%)                   |
| 17-12-11 | 28011         | Y   | 403 (1.4%) | 240 (59.6%)     | 132 (32.8%)            | 169.50 (42.1%)         | 65.5 | 1-49  | 242.50 (60.2%)             | 9 (2.2%)                    |
| 17-12-06 | 13280         | Y   | 251 (1.9%) | 185 (73.7%)     | 48 (19.1%)             | 66.50 (26.5%)          | 43.5 | 1-9   | 188.50 (75.1%)             | 4 (1.6%)                    |
| 17-12-01 | 3195          | Y   | 61 (1.9%)  | 47 (77.0%)      | 11 (18.0%)             | 12.50 (20.5%)          | 12.5 | 1-1   | 48.50 (79.5%)              |                             |
| 14-11-96 | 7             | Y   | 1 (14.3%)  | 1 (100.0%)      |                        |                        |      |       | 1.00 (100.0%)              |                             |

**Table S12.** DRMs with prevalence > 0.5% found in position RT:K101 in B data set, and the evolution of their presence over time.

| date     | total samples | DRM | (%) of all | resistant cases |                        | cases (% of resistant) | TDR  |       | ADR cases (% of resistant) | loss cases (% of resistant) |
|----------|---------------|-----|------------|-----------------|------------------------|------------------------|------|-------|----------------------------|-----------------------------|
|          |               |     |            | experienced     | naive (% of resistant) |                        | num. | sizes |                            |                             |
| 14-03-16 | 39159         | E   | 276 (0.7%) | 189 (68.5%)     | 64 (23.2%)             | 94.50 (34.2%)          | 71.5 | 1-9   | 190.50 (69.0%)             | 9 (3.3%)                    |
| 17-12-11 | 28011         | E   | 223 (0.8%) | 161 (72.2%)     | 45 (20.2%)             | 61.00 (27.4%)          | 51.5 | 1-3   | 166.00 (74.4%)             | 4 (1.8%)                    |
| 17-12-06 | 13280         | E   | 176 (1.3%) | 141 (80.1%)     | 24 (13.6%)             | 35.50 (20.2%)          | 31.5 | 1-2   | 143.50 (81.5%)             | 3 (1.7%)                    |
| 17-12-01 | 3195          | E   | 44 (1.4%)  | 40 (90.9%)      | 2 (4.5%)               | 3.00 (6.8%)            | 3    | 1-1   | 41.00 (93.2%)              |                             |
| 14-11-96 | 7             | E   |            |                 |                        |                        |      |       |                            |                             |

**Table S13.** DRMs with prevalence > 0.5% found in position RT:K103 in B data set, and the evolution of their presence over time.

| date     | total samples | DRM | (%) of all  | resistant cases |                        | cases (% of resistant) | TDR   |       | ADR cases (% of resistant) | loss cases (% of resistant) |
|----------|---------------|-----|-------------|-----------------|------------------------|------------------------|-------|-------|----------------------------|-----------------------------|
|          |               |     |             | experienced     | naive (% of resistant) |                        | num.  | sizes |                            |                             |
| 14-03-16 | 39159         | N   | 2025 (5.2%) | 1104 (54.5%)    | 745 (36.8%)            | 1071.51 (52.9%)        | 516.5 | 1-78  | 1088.49 (53.8%)            | 135 (6.7%)                  |
| 17-12-11 | 28011         | N   | 1584 (5.7%) | 925 (58.4%)     | 540 (34.1%)            | 722.25 (45.6%)         | 377.5 | 1-57  | 933.75 (58.9%)             | 72 (4.5%)                   |
| 17-12-06 | 13280         | N   | 1042 (7.8%) | 731 (70.2%)     | 228 (21.9%)            | 323.00 (31.0%)         | 219   | 1-16  | 745.00 (71.5%)             | 26 (2.5%)                   |
| 17-12-01 | 3195          | N   | 269 (8.4%)  | 230 (85.5%)     | 24 (8.9%)              | 33.50 (12.5%)          | 33.5  | 1-2   | 235.50 (87.5%)             |                             |
| 14-11-96 | 7             | N   |             |                 |                        |                        |       |       |                            |                             |

**Table S14.** DRMs with prevalence  $> 0.5\%$  found in position RT:K219 in B data set, and the evolution of their presence over time.

| date     | total<br>samples | DRM | resistant cases |                  |             | TDR                          |         |       | ADR                          | loss                         |
|----------|------------------|-----|-----------------|------------------|-------------|------------------------------|---------|-------|------------------------------|------------------------------|
|          |                  |     | ( % of all)     | treatment-       |             | cases<br>(% of<br>resistant) | cluster |       | cases<br>(% of<br>resistant) | cases<br>(% of<br>resistant) |
|          |                  |     |                 | experienced      | naive       |                              | num.    | sizes |                              |                              |
|          |                  |     |                 | (% of resistant) |             |                              |         |       |                              |                              |
| 14-03-16 | 39159            | E   | 262 (0.7%)      | 192 (73.3%)      | 43 (16.4%)  | 74.75 (28.5%)                | 51.5    | 1-9   | 192.25 (73.4%)               | 5 (1.9%)                     |
|          |                  | N   | 238 (0.6%)      | 92 (38.7%)       | 127 (53.4%) | 161.00 (67.6%)               | 23      | 1-113 | 81.00 (34.0%)                | 4 (1.7%)                     |
|          |                  | Q   | 563 (1.4%)      | 322 (57.2%)      | 194 (34.5%) | 307.25 (54.6%)               | 99      | 1-92  | 303.75 (54.0%)               | 48 (8.5%)                    |
| 17-12-11 | 28011            | E   | 227 (0.8%)      | 181 (79.7%)      | 31 (13.7%)  | 50.50 (22.2%)                | 34      | 1-9   | 180.50 (79.5%)               | 4 (1.8%)                     |
|          |                  | N   | 194 (0.7%)      | 83 (42.8%)       | 101 (52.1%) | 119.50 (61.6%)               | 17.5    | 1-86  | 76.50 (39.4%)                | 2 (1.0%)                     |
|          |                  | Q   | 497 (1.8%)      | 299 (60.2%)      | 164 (33.0%) | 245.75 (49.4%)               | 80.5    | 1-78  | 289.25 (58.2%)               | 38 (7.6%)                    |
| 17-12-06 | 13280            | E   | 169 (1.3%)      | 145 (85.8%)      | 11 (6.5%)   | 25.50 (15.1%)                | 21.5    | 1-2   | 147.50 (87.3%)               | 4 (2.4%)                     |
|          |                  | N   | 101 (0.8%)      | 66 (65.3%)       | 32 (31.7%)  | 40.50 (40.1%)                | 13.5    | 1-17  | 62.50 (61.9%)                | 2 (2.0%)                     |
|          |                  | Q   | 365 (2.7%)      | 256 (70.1%)      | 86 (23.6%)  | 129.25 (35.4%)               | 57      | 1-32  | 256.75 (70.3%)               | 21 (5.8%)                    |
| 17-12-01 | 3195             | E   | 74 (2.3%)       | 67 (90.5%)       | 5 (6.8%)    | 7.00 (9.5%)                  | 7       | 1-2   | 67.00 (90.5%)                |                              |
|          |                  | N   | 26 (0.8%)       | 20 (76.9%)       | 5 (19.2%)   | 5.50 (21.2%)                 | 3.5     | 1-3   | 20.50 (78.8%)                |                              |
|          |                  | Q   | 147 (4.6%)      | 127 (86.4%)      | 15 (10.2%)  | 21.50 (14.6%)                | 17.5    | 1-2   | 128.50 (87.4%)               | 3 (2.0%)                     |
| 14-11-96 | 7                | E   |                 |                  |             |                              |         |       |                              |                              |
|          |                  | N   | 1 (14.3%)       | 1 (100.0%)       |             |                              |         |       | 1.00 (100.0%)                |                              |
|          |                  | Q   | 1 (14.3%)       | 1 (100.0%)       |             |                              |         |       | 1.00 (100.0%)                |                              |

**Table S15.** DRMs with prevalence  $> 0.5\%$  found in position RT:K65 in B data set, and the evolution of their presence over time.

| date     | total<br>samples | DRM | resistant cases |             |                           | TDR                          |                 |       | ADR                          | loss                         |
|----------|------------------|-----|-----------------|-------------|---------------------------|------------------------------|-----------------|-------|------------------------------|------------------------------|
|          |                  |     | (% of all)      | treatment-  |                           | cases<br>(% of<br>resistant) | cluster<br>num. | sizes | cases<br>(% of<br>resistant) | cases<br>(% of<br>resistant) |
|          |                  |     |                 | experienced | naive<br>(% of resistant) |                              |                 |       |                              |                              |
| 14-03-16 | 39159            | R   | 225 (0.6%)      | 170 (75.6%) | 19 (8.4%)                 | 50.88 (22.6%)                | 42              | 1-2   | 187.12 (83.2%)               | 13 (5.8%)                    |
| 17-12-11 | 28011            | R   | 189 (0.7%)      | 146 (77.2%) | 15 (7.9%)                 | 37.62 (19.9%)                | 33              | 1-2   | 159.38 (84.3%)               | 8 (4.2%)                     |
| 17-12-06 | 13280            | R   | 143 (1.1%)      | 114 (79.7%) | 8 (5.6%)                  | 23.12 (16.2%)                | 20.5            | 1-2   | 123.88 (86.6%)               | 4 (2.8%)                     |
| 17-12-01 | 3195             | R   | 19 (0.6%)       | 18 (94.7%)  |                           | 0.50 (2.6%)                  | 0.5             | 1-1   | 18.50 (97.4%)                |                              |
| 14-11-96 | 7                | R   |                 |             |                           |                              |                 |       |                              |                              |

**Table S16.** DRMs with prevalence  $> 0.5\%$  found in position RT:K70 in B data set, and the evolution of their presence over time.

| date     | total<br>samples | DRM | resistant cases |             |                            | TDR                           |         |       | ADR                           | loss                          |
|----------|------------------|-----|-----------------|-------------|----------------------------|-------------------------------|---------|-------|-------------------------------|-------------------------------|
|          |                  |     | ( % of all)     | treatment-  |                            | cases<br>( % of<br>resistant) | cluster |       | cases<br>( % of<br>resistant) | cases<br>( % of<br>resistant) |
|          |                  |     |                 | experienced | naive<br>( % of resistant) |                               | num.    | sizes |                               |                               |
| 14-03-16 | 39159            | R   | 711 (1.8%)      | 610 (85.8%) | 54 (7.6%)                  | 143.75 (20.2%)                | 98.5    | 1-7   | 615.25 (86.5%)                | 48 (6.8%)                     |
| 17-12-11 | 28011            | R   | 681 (2.4%)      | 596 (87.5%) | 46 (6.8%)                  | 120.50 (17.7%)                | 84      | 1-5   | 602.50 (88.5%)                | 42 (6.2%)                     |
| 17-12-06 | 13280            | R   | 604 (4.5%)      | 534 (88.4%) | 36 (6.0%)                  | 91.00 (15.1%)                 | 67      | 1-4   | 541.00 (89.6%)                | 28 (4.6%)                     |
| 17-12-01 | 3195             | R   | 294 (9.2%)      | 269 (91.5%) | 18 (6.1%)                  | 27.50 (9.4%)                  | 25.5    | 1-2   | 269.50 (91.7%)                | 3 (1.0%)                      |
| 14-11-96 | 7                | R   | 2 (28.6%)       | 2 (100.0%)  |                            |                               |         |       | 2.00 (100.0%)                 |                               |

**Table S17.** DRMs with prevalence > 0.5% found in position RT:L210 in B data set, and the evolution of their presence over time.

| date     | total<br>samples | DRM | resistant cases |                                      |             | TDR                           |                            |     | ADR                           | loss                          |
|----------|------------------|-----|-----------------|--------------------------------------|-------------|-------------------------------|----------------------------|-----|-------------------------------|-------------------------------|
|          |                  |     | ( % of all)     | treatment-<br>experienced      naive |             | cases<br>( % of<br>resistant) | cluster<br>num.      sizes |     | cases<br>( % of<br>resistant) | cases<br>( % of<br>resistant) |
|          |                  |     |                 | ( % of resistant)                    |             |                               |                            |     |                               |                               |
| 14-03-16 | 39159            | W   | 705 (1.8%)      | 520 (73.8%)                          | 140 (19.9%) | 205.00 (29.1%)                | 147                        | 1-9 | 524.00 (74.3%)                | 24 (3.4%)                     |
| 17-12-11 | 28011            | W   | 649 (2.3%)      | 501 (77.2%)                          | 113 (17.4%) | 161.75 (24.9%)                | 121                        | 1-7 | 506.25 (78.0%)                | 19 (2.9%)                     |
| 17-12-06 | 13280            | W   | 556 (4.2%)      | 452 (81.3%)                          | 70 (12.6%)  | 106.75 (19.2%)                | 81                         | 1-7 | 460.25 (82.8%)                | 11 (2.0%)                     |
| 17-12-01 | 3195             | W   | 236 (7.4%)      | 203 (86.0%)                          | 20 (8.5%)   | 26.50 (11.2%)                 | 22.5                       | 1-4 | 209.50 (88.8%)                |                               |
| 14-11-96 | 7                | W   | 3 (42.9%)       | 3 (100.0%)                           |             |                               |                            |     | 3.00 (100.0%)                 |                               |

**Table S18.** DRMs with prevalence > 0.5% found in position RT:L74 in B data set, and the evolution of their presence over time.

| date     | total<br>samples | DRM | resistant cases |             |                            | TDR                           |         |       | ADR                           | loss                          |
|----------|------------------|-----|-----------------|-------------|----------------------------|-------------------------------|---------|-------|-------------------------------|-------------------------------|
|          |                  |     | ( % of all)     | treatment-  |                            | cases<br>( % of<br>resistant) | cluster |       | cases<br>( % of<br>resistant) | cases<br>( % of<br>resistant) |
|          |                  |     |                 | experienced | naive<br>( % of resistant) |                               | num.    | sizes |                               |                               |
| 14-03-16 | 39159            | V   | 242 (0.6%)      | 200 (82.6%) | 17 (7.0%)                  | 38.25 (15.8%)                 | 36      | 1-3   | 207.75 (85.8%)                | 4 (1.7%)                      |
| 17-12-11 | 28011            | V   | 216 (0.8%)      | 182 (84.3%) | 15 (6.9%)                  | 30.50 (14.1%)                 | 29.5    | 1-3   | 189.50 (87.7%)                | 4 (1.9%)                      |
| 17-12-06 | 13280            | V   | 172 (1.3%)      | 147 (85.5%) | 11 (6.4%)                  | 21.50 (12.5%)                 | 21.5    | 1-2   | 152.50 (88.7%)                | 2 (1.2%)                      |
| 17-12-01 | 3195             | V   | 54 (1.7%)       | 48 (88.9%)  | 2 (3.7%)                   | 4.00 (7.4%)                   | 4       | 1-1   | 50.00 (92.6%)                 |                               |
| 14-11-96 | 7                | V   |                 |             |                            |                               |         |       |                               |                               |

**Table S19.** DRMs with prevalence > 0.5% found in position RT:M184 in B data set, and the evolution of their presence over time.

| date     | total<br>samples | DRM | resistant cases  |              |            | TDR                          |         |       | ADR                          | loss                         |
|----------|------------------|-----|------------------|--------------|------------|------------------------------|---------|-------|------------------------------|------------------------------|
|          |                  |     | (% of all)       | treatment-   |            | cases<br>(% of<br>resistant) | cluster |       | cases<br>(% of<br>resistant) | cases<br>(% of<br>resistant) |
|          |                  |     |                  | experienced  | naive      |                              | num.    | sizes |                              |                              |
|          |                  |     | (% of resistant) |              |            |                              |         |       |                              |                              |
| 14-03-16 | 39159            | V   | 1899 (4.8%)      | 1642 (86.5%) | 110 (5.8%) | 343.62 (18.1%)               | 278.5   | 1-4   | 1667.38 (87.8%)              | 112 (5.9%)                   |
| 17-12-11 | 28011            | V   | 1703 (6.1%)      | 1493 (87.7%) | 94 (5.5%)  | 266.62 (15.7%)               | 213.5   | 1-4   | 1517.38 (89.1%)              | 81 (4.8%)                    |
| 17-12-06 | 13280            | V   | 1428 (10.8%)     | 1259 (88.2%) | 74 (5.2%)  | 190.56 (13.3%)               | 156.5   | 1-3   | 1284.44 (89.9%)              | 47 (3.3%)                    |
| 17-12-01 | 3195             | V   | 603 (18.9%)      | 551 (91.4%)  | 22 (3.6%)  | 50.56 (8.4%)                 | 45      | 1-3   | 560.44 (92.9%)               | 8 (1.3%)                     |
| 14-11-96 | 7                | V   | 2 (28.6%)        | 2 (100.0%)   |            |                              |         |       | 2.00 (100.0%)                |                              |

**Table S20.** DRMs with prevalence > 0.5% found in position RT:M41 in B data set, and the evolution of their presence over time.

| date     | total<br>samples | DRM | resistant cases |             |                           | TDR                          |                 |       | ADR                          | loss                         |
|----------|------------------|-----|-----------------|-------------|---------------------------|------------------------------|-----------------|-------|------------------------------|------------------------------|
|          |                  |     | (% of all)      | treatment-  |                           | cases<br>(% of<br>resistant) | cluster<br>num. | sizes | cases<br>(% of<br>resistant) | cases<br>(% of<br>resistant) |
|          |                  |     |                 | experienced | naive<br>(% of resistant) |                              |                 |       |                              |                              |
| 14-03-16 | 39159            | L   | 1513 (3.9%)     | 982 (64.9%) | 428 (28.3%)               | 618.50 (40.9%)               | 305.5           | 1-55  | 968.50 (64.0%)               | 74 (4.9%)                    |
| 17-12-11 | 28011            | L   | 1389 (5.0%)     | 938 (67.5%) | 367 (26.4%)               | 507.50 (36.5%)               | 266.5           | 1-38  | 935.50 (67.4%)               | 54 (3.9%)                    |
| 17-12-06 | 13280            | L   | 1099 (8.3%)     | 826 (75.2%) | 208 (18.9%)               | 294.00 (26.8%)               | 188             | 1-16  | 830.00 (75.5%)               | 25 (2.3%)                    |
| 17-12-01 | 3195             | L   | 459 (14.4%)     | 386 (84.1%) | 52 (11.3%)                | 68.75 (15.0%)                | 56              | 1-6   | 392.25 (85.5%)               | 2 (0.4%)                     |
| 14-11-96 | 7                | L   | 2 (28.6%)       | 2 (100.0%)  |                           |                              |                 |       | 2.00 (100.0%)                |                              |

**Table S21.** DRMs with prevalence > 0.5% found in position RT:S68 in B data set, and the evolution of their presence over time.

| date     | total samples | DRM | (%) of all) | resistant cases                         |                         | cases (%) of resistant) | TDR   |               | ADR cases (%) of resistant) | loss cases (%) of resistant) |
|----------|---------------|-----|-------------|-----------------------------------------|-------------------------|-------------------------|-------|---------------|-----------------------------|------------------------------|
|          |               |     |             | treatment-experienced (%) of resistant) | naive (%) of resistant) |                         | num.  | cluster sizes |                             |                              |
| 14-03-16 | 39159         | G   | 3178 (8.1%) | 436 (13.7%)                             | 2482 (78.1%)            | 2922.56 (92.0%)         | 612.5 | 1-759         | 316.44 (10.0%)              | 61 (1.9%)                    |
| 17-12-11 | 28011         | G   | 2055 (7.3%) | 318 (15.5%)                             | 1601 (77.9%)            | 1845.00 (89.8%)         | 468.5 | 1-486         | 251.00 (12.2%)              | 41 (2.0%)                    |
| 17-12-06 | 13280         | G   | 868 (6.5%)  | 204 (23.5%)                             | 610 (70.3%)             | 721.00 (83.1%)          | 234.5 | 1-174         | 166.00 (19.1%)              | 19 (2.2%)                    |
| 17-12-01 | 3195          | G   | 148 (4.6%)  | 63 (42.6%)                              | 78 (52.7%)              | 98.50 (66.6%)           | 60    | 1-22          | 54.50 (36.8%)               | 5 (3.4%)                     |
| 14-11-96 | 7             | G   |             |                                         |                         |                         |       |               |                             |                              |

**Table S22.** DRMs with prevalence > 0.5% found in position RT:T215 in B data set, and the evolution of their presence over time.

| date     | total samples | DRM | (%) of all) | resistant cases                         |                         | cases (%) of resistant) | TDR   |               | ADR cases (%) of resistant) | loss cases (%) of resistant) |
|----------|---------------|-----|-------------|-----------------------------------------|-------------------------|-------------------------|-------|---------------|-----------------------------|------------------------------|
|          |               |     |             | treatment-experienced (%) of resistant) | naive (%) of resistant) |                         | num.  | cluster sizes |                             |                              |
| 14-03-16 | 39159         | D   | 462 (1.2%)  | 86 (18.6%)                              | 334 (72.3%)             | 459.25 (99.4%)          | 103   | 1-99          | 71.75 (15.5%)               | 69 (14.9%)                   |
|          |               | F   | 257 (0.7%)  | 215 (83.7%)                             | 19 (7.4%)               | 41.25 (16.1%)           | 37    | 1-4           | 222.75 (86.7%)              | 7 (2.7%)                     |
|          |               | S   | 378 (1.0%)  | 59 (15.6%)                              | 293 (77.5%)             | 364.25 (96.4%)          | 115   | 1-45          | 51.75 (13.7%)               | 38 (10.1%)                   |
|          |               | Y   | 883 (2.3%)  | 790 (89.5%)                             | 37 (4.2%)               | 119.50 (13.5%)          | 102.5 | 1-5           | 785.50 (89.0%)              | 22 (2.5%)                    |
| 17-12-11 | 28011         | D   | 367 (1.3%)  | 68 (18.5%)                              | 272 (74.1%)             | 366.50 (99.9%)          | 91    | 1-68          | 62.50 (17.0%)               | 62 (16.9%)                   |
|          |               | F   | 246 (0.9%)  | 209 (85.0%)                             | 17 (6.9%)               | 36.50 (14.8%)           | 33.5  | 1-4           | 214.50 (87.2%)              | 5 (2.0%)                     |
|          |               | S   | 282 (1.0%)  | 37 (13.1%)                              | 228 (80.9%)             | 276.75 (98.1%)          | 90    | 1-30          | 38.25 (13.6%)               | 33 (11.7%)                   |
|          |               | Y   | 858 (3.1%)  | 770 (89.7%)                             | 36 (4.2%)               | 105.00 (12.2%)          | 93    | 1-5           | 768.00 (89.5%)              | 15 (1.7%)                    |
| 17-12-06 | 13280         | D   | 198 (1.5%)  | 44 (22.2%)                              | 143 (72.2%)             | 187.00 (94.4%)          | 63    | 1-34          | 48.00 (24.2%)               | 37 (18.7%)                   |
|          |               | F   | 221 (1.7%)  | 187 (84.6%)                             | 16 (7.2%)               | 30.50 (13.8%)           | 29.5  | 1-3           | 193.50 (87.6%)              | 3 (1.4%)                     |
|          |               | S   | 128 (1.0%)  | 24 (18.8%)                              | 93 (72.7%)              | 125.50 (98.0%)          | 50.5  | 1-10          | 28.50 (22.3%)               | 26 (20.3%)                   |
|          |               | Y   | 777 (5.9%)  | 696 (89.6%)                             | 33 (4.2%)               | 82.00 (10.6%)           | 73    | 1-5           | 701.00 (90.2%)              | 6 (0.8%)                     |
| 17-12-01 | 3195          | D   | 47 (1.5%)   | 13 (27.7%)                              | 31 (66.0%)              | 35.50 (75.5%)           | 21.5  | 1-4           | 14.50 (30.9%)               | 3 (6.4%)                     |
|          |               | F   | 98 (3.1%)   | 91 (92.9%)                              | 5 (5.1%)                | 8.00 (8.2%)             | 8     | 1-2           | 90.00 (91.8%)               |                              |
|          |               | S   | 23 (0.7%)   | 7 (30.4%)                               | 14 (60.9%)              | 17.00 (73.9%)           | 9.5   | 1-3           | 9.00 (39.1%)                | 3 (13.0%)                    |
|          |               | Y   | 362 (11.3%) | 334 (92.3%)                             | 11 (3.0%)               | 21.75 (6.0%)            | 21.5  | 1-2           | 341.25 (94.3%)              | 1 (0.3%)                     |
| 14-11-96 | 7             | D   | 1 (14.3%)   | 1 (100.0%)                              |                         |                         |       |               | 1.00 (100.0%)               |                              |
|          |               | F   | 1 (14.3%)   | 1 (100.0%)                              |                         |                         |       |               | 1.00 (100.0%)               |                              |
|          |               | S   |             |                                         |                         |                         |       |               |                             |                              |
|          |               | Y   | 2 (28.6%)   | 2 (100.0%)                              |                         |                         |       |               | 2.00 (100.0%)               |                              |

**Table S23.** DRMs with prevalence > 0.5% found in position RT:V106 in B data set, and the evolution of their presence over time.

| date     | total samples | DRM | (%) of all) | resistant cases                         |                         | cases (%) of resistant) | TDR   |               | ADR cases (%) of resistant) | loss cases (%) of resistant) |
|----------|---------------|-----|-------------|-----------------------------------------|-------------------------|-------------------------|-------|---------------|-----------------------------|------------------------------|
|          |               |     |             | treatment-experienced (%) of resistant) | naive (%) of resistant) |                         | num.  | cluster sizes |                             |                              |
| 14-03-16 | 39159         | I   | 1051 (2.7%) | 217 (20.6%)                             | 715 (68.0%)             | 956.16 (91.0%)          | 494.5 | 1-74          | 230.84 (22.0%)              | 136 (12.9%)                  |
| 17-12-11 | 28011         | I   | 717 (2.6%)  | 152 (21.2%)                             | 494 (68.9%)             | 651.38 (90.8%)          | 340   | 1-57          | 164.62 (23.0%)              | 99 (13.8%)                   |
| 17-12-06 | 13280         | I   | 321 (2.4%)  | 94 (29.3%)                              | 201 (62.6%)             | 262.75 (81.9%)          | 158   | 1-16          | 100.25 (31.2%)              | 42 (13.1%)                   |
| 17-12-01 | 3195          | I   | 64 (2.0%)   | 29 (45.3%)                              | 35 (54.7%)              | 45.00 (70.3%)           | 31    | 1-3           | 29.00 (45.3%)               | 10 (15.6%)                   |
| 14-11-96 | 7             | I   |             |                                         |                         |                         |       |               |                             |                              |

**Table S24.** DRMs with prevalence > 0.5% found in position RT:V108 in B data set, and the evolution of their presence over time.

| date     | total samples | DRM | (%) of all | resistant cases |                        | TDR                     |       |               | ADR cases (%) of resistant) | loss cases (%) of resistant) |
|----------|---------------|-----|------------|-----------------|------------------------|-------------------------|-------|---------------|-----------------------------|------------------------------|
|          |               |     |            | experienced     | naive (% of resistant) | cases (%) of resistant) | num.  | cluster sizes |                             |                              |
| 14-03-16 | 39159         | I   | 429 (1.1%) | 219 (51.0%)     | 167 (38.9%)            | 230.00 (53.6%)          | 166   | 1-8           | 232.00 (54.1%)              | 33 (7.7%)                    |
| 17-12-11 | 28011         | I   | 338 (1.2%) | 186 (55.0%)     | 126 (37.3%)            | 161.25 (47.7%)          | 127.5 | 1-4           | 195.75 (57.9%)              | 19 (5.6%)                    |
| 17-12-06 | 13280         | I   | 224 (1.7%) | 134 (59.8%)     | 73 (32.6%)             | 89.50 (40.0%)           | 76.5  | 1-4           | 139.50 (62.3%)              | 5 (2.2%)                     |
| 17-12-01 | 3195          | I   | 53 (1.7%)  | 36 (67.9%)      | 13 (24.5%)             | 15.00 (28.3%)           | 14    | 1-2           | 38.00 (71.7%)               |                              |
| 14-11-96 | 7             | I   |            |                 |                        |                         |       |               |                             |                              |

**Table S25.** DRMs with prevalence > 0.5% found in position RT:V179 in B data set, and the evolution of their presence over time.

| date     | total samples | DRM | (%) of all | resistant cases |                        | TDR                     |       |               | ADR cases (%) of resistant) | loss cases (%) of resistant) |
|----------|---------------|-----|------------|-----------------|------------------------|-------------------------|-------|---------------|-----------------------------|------------------------------|
|          |               |     |            | experienced     | naive (% of resistant) | cases (%) of resistant) | num.  | cluster sizes |                             |                              |
| 14-03-16 | 39159         | D   | 790 (2.0%) | 151 (19.1%)     | 559 (70.8%)            | 694.12 (87.9%)          | 334.5 | 1-45          | 158.88 (20.1%)              | 63 (8.0%)                    |
| 17-12-11 | 28011         | D   | 539 (1.9%) | 112 (20.8%)     | 371 (68.8%)            | 462.06 (85.7%)          | 239   | 1-38          | 122.94 (22.8%)              | 46 (8.5%)                    |
| 17-12-06 | 13280         | D   | 225 (1.7%) | 76 (33.8%)      | 128 (56.9%)            | 165.50 (73.6%)          | 105   | 1-23          | 82.50 (36.7%)               | 23 (10.2%)                   |
| 17-12-01 | 3195          | D   | 41 (1.3%)  | 23 (56.1%)      | 16 (39.0%)             | 20.00 (48.8%)           | 16    | 1-3           | 23.00 (56.1%)               | 2 (4.9%)                     |
| 14-11-96 | 7             | D   |            |                 |                        |                         |       |               |                             |                              |

**Table S26.** DRMs with prevalence > 0.5% found in position RT:Y181 in B data set, and the evolution of their presence over time.

| date     | total samples | DRM | (%) of all | resistant cases |                        | TDR                     |      |               | ADR cases (%) of resistant) | loss cases (%) of resistant) |
|----------|---------------|-----|------------|-----------------|------------------------|-------------------------|------|---------------|-----------------------------|------------------------------|
|          |               |     |            | experienced     | naive (% of resistant) | cases (%) of resistant) | num. | cluster sizes |                             |                              |
| 14-03-16 | 39159         | C   | 694 (1.8%) | 495 (71.3%)     | 115 (16.6%)            | 208.00 (30.0%)          | 148  | 1-12          | 509.00 (73.3%)              | 23 (3.3%)                    |
| 17-12-11 | 28011         | C   | 600 (2.1%) | 442 (73.7%)     | 96 (16.0%)             | 159.50 (26.6%)          | 110  | 1-12          | 457.50 (76.2%)              | 17 (2.8%)                    |
| 17-12-06 | 13280         | C   | 459 (3.5%) | 353 (76.9%)     | 56 (12.2%)             | 96.50 (21.0%)           | 79.5 | 1-5           | 370.50 (80.7%)              | 8 (1.7%)                     |
| 17-12-01 | 3195          | C   | 126 (3.9%) | 112 (88.9%)     | 7 (5.6%)               | 10.50 (8.3%)            | 10.5 | 1-1           | 115.50 (91.7%)              |                              |
| 14-11-96 | 7             | C   |            |                 |                        |                         |      |               |                             |                              |

**Table S27.** DRMs with prevalence > 0.5% found in position PR:L90 in C data set, and the evolution of their presence over time.

| date     | total samples | DRM | (%) of all | resistant cases |                        | TDR                     |      |               | ADR cases (%) of resistant) | loss cases (%) of resistant) |
|----------|---------------|-----|------------|-----------------|------------------------|-------------------------|------|---------------|-----------------------------|------------------------------|
|          |               |     |            | experienced     | naive (% of resistant) | cases (%) of resistant) | num. | cluster sizes |                             |                              |
| 14-03-16 | 18809         | M   | 108 (0.6%) | 62 (57.4%)      | 22 (20.4%)             | 43.00 (39.8%)           | 35.5 | 1-4           | 67.00 (62.0%)               | 2 (1.9%)                     |
| 17-12-11 | 14035         | M   | 91 (0.6%)  | 57 (62.6%)      | 14 (15.4%)             | 31.25 (34.3%)           | 27   | 1-3           | 60.75 (66.8%)               | 1 (1.1%)                     |
| 17-12-06 | 5374          | M   | 68 (1.3%)  | 47 (69.1%)      | 6 (8.8%)               | 16.00 (23.5%)           | 15   | 1-3           | 52.00 (76.5%)               |                              |
| 17-12-01 | 338           | M   | 11 (3.3%)  | 7 (63.6%)       | 1 (9.1%)               | 2.50 (22.7%)            | 2.5  | 1-1           | 8.50 (77.3%)                |                              |



**Table S28.** DRMs with prevalence > 0.5% found in position PR:Q58 in C data set, and the evolution of their presence over time.

| date     | total samples | DRM | resistant cases |                                        |                        | TDR                    |              |       | ADR cases (% of resistant) | loss cases (% of resistant) |
|----------|---------------|-----|-----------------|----------------------------------------|------------------------|------------------------|--------------|-------|----------------------------|-----------------------------|
|          |               |     | (% of all)      | treatment-experienced (% of resistant) | naive (% of resistant) | cases (% of resistant) | cluster num. | sizes |                            |                             |
| 14-03-16 | 18809         | E   | 153 (0.8%)      | 31 (20.3%)                             | 97 (63.4%)             | 117.75 (77.0%)         | 81.5         | 1-12  | 37.25 (24.3%)              | 2 (1.3%)                    |
| 17-12-11 | 14035         | E   | 104 (0.7%)      | 24 (23.1%)                             | 68 (65.4%)             | 79.00 (76.0%)          | 61           | 1-9   | 27.00 (26.0%)              | 2 (1.9%)                    |
| 17-12-06 | 5374          | E   | 34 (0.6%)       | 10 (29.4%)                             | 20 (58.8%)             | 23.00 (67.6%)          | 21           | 1-2   | 12.00 (35.3%)              | 1 (2.9%)                    |
| 17-12-01 | 338           | E   | 1 (0.3%)        |                                        |                        | 0.50 (50.0%)           | 0.5          | 1-1   | 0.50 (50.0%)               |                             |

**Table S29.** DRMs with prevalence > 0.5% found in position RT:A98 in C data set, and the evolution of their presence over time.

| date     | total samples | DRM | resistant cases |                                        |                        | TDR                    |              |       | ADR cases (% of resistant) | loss cases (% of resistant) |
|----------|---------------|-----|-----------------|----------------------------------------|------------------------|------------------------|--------------|-------|----------------------------|-----------------------------|
|          |               |     | (% of all)      | treatment-experienced (% of resistant) | naive (% of resistant) | cases (% of resistant) | cluster num. | sizes |                            |                             |
| 14-03-16 | 18809         | G   | 239 (1.3%)      | 115 (48.1%)                            | 78 (32.6%)             | 112.12 (46.9%)         | 99           | 1-4   | 126.88 (53.1%)             |                             |
| 17-12-11 | 14035         | G   | 187 (1.3%)      | 89 (47.6%)                             | 65 (34.8%)             | 88.12 (47.1%)          | 77.5         | 1-4   | 98.88 (52.9%)              |                             |
| 17-12-06 | 5374          | G   | 93 (1.7%)       | 55 (59.1%)                             | 17 (18.3%)             | 32.31 (34.7%)          | 28.5         | 1-4   | 60.69 (65.3%)              |                             |
| 17-12-01 | 338           | G   | 10 (3.0%)       | 7 (70.0%)                              | 1 (10.0%)              | 2.25 (22.5%)           | 2            | 1-2   | 7.75 (77.5%)               |                             |

**Table S30.** DRMs with prevalence > 0.5% found in position RT:D67 in C data set, and the evolution of their presence over time.

| date     | total samples | DRM | resistant cases |                                        |                        | TDR                    |              |       | ADR cases (% of resistant) | loss cases (% of resistant) |
|----------|---------------|-----|-----------------|----------------------------------------|------------------------|------------------------|--------------|-------|----------------------------|-----------------------------|
|          |               |     | (% of all)      | treatment-experienced (% of resistant) | naive (% of resistant) | cases (% of resistant) | cluster num. | sizes |                            |                             |
| 14-03-16 | 18809         | N   | 289 (1.5%)      | 215 (74.4%)                            | 25 (8.7%)              | 65.25 (22.6%)          | 56.5         | 1-4   | 228.75 (79.2%)             | 5 (1.7%)                    |
| 17-12-11 | 14035         | N   | 247 (1.8%)      | 187 (75.7%)                            | 22 (8.9%)              | 49.00 (19.8%)          | 42.5         | 1-4   | 199.00 (80.6%)             | 1 (0.4%)                    |
| 17-12-06 | 5374          | N   | 166 (3.1%)      | 130 (78.3%)                            | 11 (6.6%)              | 28.81 (17.4%)          | 26.5         | 1-4   | 138.19 (83.2%)             | 1 (0.6%)                    |
| 17-12-01 | 338           | N   | 23 (6.8%)       | 18 (78.3%)                             | 1 (4.3%)               | 4.25 (18.5%)           | 4            | 1-2   | 18.75 (81.5%)              |                             |

**Table S31.** DRMs with prevalence > 0.5% found in position RT:E138 in C data set, and the evolution of their presence over time.

| date     | total samples | DRM | resistant cases |                                        |                        | TDR                    |              |        | ADR cases (% of resistant) | loss cases (% of resistant) |
|----------|---------------|-----|-----------------|----------------------------------------|------------------------|------------------------|--------------|--------|----------------------------|-----------------------------|
|          |               |     | (% of all)      | treatment-experienced (% of resistant) | naive (% of resistant) | cases (% of resistant) | cluster num. | sizes  |                            |                             |
| 14-03-16 | 18809         | A   | 2176 (11.6%)    | 512 (23.5%)                            | 1381 (63.5%)           | 2136.88 (98.2%)        | 415.5        | 1-1178 | 196.12 (9.0%)              | 157 (7.2%)                  |
| 17-12-11 | 14035         | A   | 1609 (11.5%)    | 331 (20.6%)                            | 1132 (70.4%)           | 1609.25 (100.0%)       | 345          | 1-852  | 135.75 (8.4%)              | 136 (8.5%)                  |
| 17-12-06 | 5374          | A   | 617 (11.5%)     | 154 (25.0%)                            | 417 (67.6%)            | 615.50 (99.8%)         | 150.5        | 1-322  | 65.50 (10.6%)              | 64 (10.4%)                  |
| 17-12-01 | 338           | A   | 28 (8.3%)       | 10 (35.7%)                             | 12 (42.9%)             | 26.50 (94.6%)          | 5.5          | 1-18   | 6.50 (23.2%)               | 5 (17.9%)                   |

**Table S32.** DRMs with prevalence > 0.5% found in position RT:G190 in C data set, and the evolution of their presence over time.

| date     | total samples | DRM | resistant cases |                                           |                           | TDR                       |      |               | ADR            | loss     |
|----------|---------------|-----|-----------------|-------------------------------------------|---------------------------|---------------------------|------|---------------|----------------|----------|
|          |               |     | (% of all)      | treatment-experienced<br>(% of resistant) | naive<br>(% of resistant) | cases<br>(% of resistant) | num. | cluster sizes |                |          |
| 14-03-16 | 18809         | A   | 287 (1.5%)      | 213 (74.2%)                               | 34 (11.8%)                | 71.25 (24.8%)             | 65.5 | 1-4           | 224.75 (78.3%) | 9 (3.1%) |
| 17-12-11 | 14035         | A   | 233 (1.7%)      | 173 (74.2%)                               | 27 (11.6%)                | 50.75 (21.8%)             | 47   | 1-4           | 184.25 (79.1%) | 2 (0.9%) |
| 17-12-06 | 5374          | A   | 144 (2.7%)      | 111 (77.1%)                               | 14 (9.7%)                 | 27.50 (19.1%)             | 27   | 1-2           | 117.50 (81.6%) | 1 (0.7%) |
| 17-12-01 | 338           | A   | 16 (4.7%)       | 13 (81.2%)                                | 1 (6.2%)                  | 3.00 (18.8%)              | 3    | 1-2           | 13.00 (81.2%)  |          |

**Table S33.** DRMs with prevalence > 0.5% found in position RT:H221 in C data set, and the evolution of their presence over time.

| date     | total samples | DRM | resistant cases |                                           |                           | TDR                       |      |               | ADR            | loss     |
|----------|---------------|-----|-----------------|-------------------------------------------|---------------------------|---------------------------|------|---------------|----------------|----------|
|          |               |     | (% of all)      | treatment-experienced<br>(% of resistant) | naive<br>(% of resistant) | cases<br>(% of resistant) | num. | cluster sizes |                |          |
| 14-03-16 | 18809         | Y   | 173 (0.9%)      | 123 (71.1%)                               | 27 (15.6%)                | 45.75 (26.4%)             | 42.5 | 1-2           | 133.25 (77.0%) | 6 (3.5%) |
| 17-12-11 | 14035         | Y   | 144 (1.0%)      | 102 (70.8%)                               | 23 (16.0%)                | 36.25 (25.2%)             | 34   | 1-2           | 111.75 (77.6%) | 4 (2.8%) |
| 17-12-06 | 5374          | Y   | 79 (1.5%)       | 57 (72.2%)                                | 14 (17.7%)                | 19.75 (25.0%)             | 19.5 | 1-2           | 60.25 (76.3%)  | 1 (1.3%) |
| 17-12-01 | 338           | Y   | 5 (1.5%)        | 5 (100.0%)                                |                           |                           |      |               | 5.00 (100.0%)  |          |

**Table S34.** DRMs with prevalence > 0.5% found in position RT:K101 in C data set, and the evolution of their presence over time.

| date     | total samples | DRM | resistant cases |                                           |                           | TDR                       |      |               | ADR            | loss     |
|----------|---------------|-----|-----------------|-------------------------------------------|---------------------------|---------------------------|------|---------------|----------------|----------|
|          |               |     | (% of all)      | treatment-experienced<br>(% of resistant) | naive<br>(% of resistant) | cases<br>(% of resistant) | num. | cluster sizes |                |          |
| 14-03-16 | 18809         | E   | 244 (1.3%)      | 164 (67.2%)                               | 54 (22.1%)                | 82.75 (33.9%)             | 73.5 | 1-4           | 168.25 (69.0%) | 7 (2.9%) |
| 17-12-11 | 14035         | E   | 189 (1.3%)      | 129 (68.3%)                               | 43 (22.8%)                | 59.75 (31.6%)             | 54.5 | 1-4           | 133.25 (70.5%) | 4 (2.1%) |
| 17-12-06 | 5374          | E   | 98 (1.8%)       | 76 (77.6%)                                | 13 (13.3%)                | 20.50 (20.9%)             | 20.5 | 1-2           | 78.50 (80.1%)  | 1 (1.0%) |
| 17-12-01 | 338           | E   | 11 (3.3%)       | 9 (81.8%)                                 |                           | 2.00 (18.2%)              | 2    | 1-2           | 9.00 (81.8%)   |          |

**Table S35.** DRMs with prevalence > 0.5% found in position RT:K103 in C data set, and the evolution of their presence over time.

| date     | total samples | DRM | resistant cases |                                           |                           | TDR                       |       |               | ADR            | loss      |
|----------|---------------|-----|-----------------|-------------------------------------------|---------------------------|---------------------------|-------|---------------|----------------|-----------|
|          |               |     | (% of all)      | treatment-experienced<br>(% of resistant) | naive<br>(% of resistant) | cases<br>(% of resistant) | num.  | cluster sizes |                |           |
| 14-03-16 | 18809         | N   | 882 (4.7%)      | 605 (68.6%)                               | 182 (20.6%)               | 317.12 (36.0%)            | 267   | 1-5           | 615.88 (69.8%) | 51 (5.8%) |
| 17-12-11 | 14035         | N   | 654 (4.7%)      | 449 (68.7%)                               | 139 (21.3%)               | 204.62 (31.3%)            | 184.5 | 1-3           | 472.38 (72.2%) | 23 (3.5%) |
| 17-12-06 | 5374          | N   | 376 (7.0%)      | 286 (76.1%)                               | 53 (14.1%)                | 83.00 (22.1%)             | 78    | 1-3           | 298.00 (79.3%) | 5 (1.3%)  |
| 17-12-01 | 338           | N   | 23 (6.8%)       | 18 (78.3%)                                | 4 (17.4%)                 | 4.50 (19.6%)              | 4.5   | 1-1           | 18.50 (80.4%)  |           |

**Table S36.** DRMs with prevalence > 0.5% found in position RT:K219 in C data set, and the evolution of their presence over time.

| date     | total samples | DRM | resistant cases |                                        |                        | TDR                    |              |       | ADR cases (% of resistant) | loss cases (% of resistant) |
|----------|---------------|-----|-----------------|----------------------------------------|------------------------|------------------------|--------------|-------|----------------------------|-----------------------------|
|          |               |     | (% of all)      | treatment-experienced (% of resistant) | naive (% of resistant) | cases (% of resistant) | cluster num. | sizes |                            |                             |
| 14-03-16 | 18809         | E   | 109 (0.6%)      | 80 (73.4%)                             | 15 (13.8%)             | 25.50 (23.4%)          | 24.5         | 1-3   | 83.50 (76.6%)              |                             |
| 17-12-11 | 14035         | E   | 85 (0.6%)       | 65 (76.5%)                             | 12 (14.1%)             | 17.00 (20.0%)          | 17           | 1-2   | 68.00 (80.0%)              |                             |
| 17-12-06 | 5374          | E   | 54 (1.0%)       | 42 (77.8%)                             | 6 (11.1%)              | 10.00 (18.5%)          | 10           | 1-2   | 44.00 (81.5%)              |                             |
| 17-12-01 | 338           | E   | 5 (1.5%)        | 5 (100.0%)                             |                        |                        |              |       | 5.00 (100.0%)              |                             |

**Table S37.** DRMs with prevalence > 0.5% found in position RT:K65 in C data set, and the evolution of their presence over time.

| date     | total samples | DRM | resistant cases |                                        |                        | TDR                    |              |       | ADR cases (% of resistant) | loss cases (% of resistant) |
|----------|---------------|-----|-----------------|----------------------------------------|------------------------|------------------------|--------------|-------|----------------------------|-----------------------------|
|          |               |     | (% of all)      | treatment-experienced (% of resistant) | naive (% of resistant) | cases (% of resistant) | cluster num. | sizes |                            |                             |
| 14-03-16 | 18809         | R   | 244 (1.3%)      | 199 (81.6%)                            | 15 (6.1%)              | 38.50 (15.8%)          | 36.5         | 1-2   | 211.50 (86.7%)             | 6 (2.5%)                    |
| 17-12-11 | 14035         | R   | 177 (1.3%)      | 142 (80.2%)                            | 11 (6.2%)              | 26.50 (15.0%)          | 25.5         | 1-2   | 153.50 (86.7%)             | 3 (1.7%)                    |
| 17-12-06 | 5374          | R   | 97 (1.8%)       | 79 (81.4%)                             | 3 (3.1%)               | 13.00 (13.4%)          | 13           | 1-2   | 86.00 (88.7%)              | 2 (2.1%)                    |
| 17-12-01 | 338           | R   | 1 (0.3%)        |                                        |                        | 0.50 (50.0%)           | 0.5          | 1-1   | 0.50 (50.0%)               |                             |

**Table S38.** DRMs with prevalence > 0.5% found in position RT:K70 in C data set, and the evolution of their presence over time.

| date     | total samples | DRM | resistant cases |                                        |                        | TDR                    |              |       | ADR cases (% of resistant) | loss cases (% of resistant) |
|----------|---------------|-----|-----------------|----------------------------------------|------------------------|------------------------|--------------|-------|----------------------------|-----------------------------|
|          |               |     | (% of all)      | treatment-experienced (% of resistant) | naive (% of resistant) | cases (% of resistant) | cluster num. | sizes |                            |                             |
| 14-03-16 | 18809         | R   | 196 (1.0%)      | 152 (77.6%)                            | 19 (9.7%)              | 38.62 (19.7%)          | 35.5         | 1-4   | 161.38 (82.3%)             | 4 (2.0%)                    |
| 17-12-11 | 14035         | R   | 175 (1.2%)      | 140 (80.0%)                            | 16 (9.1%)              | 28.62 (16.4%)          | 27           | 1-2   | 149.38 (85.4%)             | 3 (1.7%)                    |
| 17-12-06 | 5374          | R   | 123 (2.3%)      | 98 (79.7%)                             | 10 (8.1%)              | 19.00 (15.4%)          | 19           | 1-2   | 105.00 (85.4%)             | 1 (0.8%)                    |
| 17-12-01 | 338           | R   | 14 (4.1%)       | 11 (78.6%)                             | 1 (7.1%)               | 2.00 (14.3%)           | 2            | 1-1   | 12.00 (85.7%)              |                             |

**Table S39.** DRMs with prevalence > 0.5% found in position RT:M184 in C data set, and the evolution of their presence over time.

| date     | total samples | DRM | resistant cases |                                        |                        | TDR                    |              |       | ADR cases (% of resistant) | loss cases (% of resistant) |
|----------|---------------|-----|-----------------|----------------------------------------|------------------------|------------------------|--------------|-------|----------------------------|-----------------------------|
|          |               |     | (% of all)      | treatment-experienced (% of resistant) | naive (% of resistant) | cases (% of resistant) | cluster num. | sizes |                            |                             |
| 14-03-16 | 18809         | V   | 1009 (5.4%)     | 789 (78.2%)                            | 79 (7.8%)              | 213.88 (21.2%)         | 197          | 1-4   | 833.12 (82.6%)             | 38 (3.8%)                   |
| 17-12-11 | 14035         | V   | 817 (5.8%)      | 642 (78.6%)                            | 70 (8.6%)              | 154.38 (18.9%)         | 144.5        | 1-4   | 680.62 (83.3%)             | 18 (2.2%)                   |
| 17-12-06 | 5374          | V   | 524 (9.8%)      | 419 (80.0%)                            | 41 (7.8%)              | 86.06 (16.4%)          | 80           | 1-4   | 443.94 (84.7%)             | 6 (1.1%)                    |
| 17-12-01 | 338           | V   | 53 (15.7%)      | 36 (67.9%)                             | 3 (5.7%)               | 12.19 (23.0%)          | 9            | 1-4   | 41.81 (78.9%)              | 1 (1.9%)                    |

**Table S40.** DRMs with prevalence > 0.5% found in position RT:M41 in C data set, and the evolution of their presence over time.

| date     | total samples | DRM | resistant cases |                                        |                        | TDR                    |      |               | ADR cases (% of resistant) | loss cases (% of resistant) |
|----------|---------------|-----|-----------------|----------------------------------------|------------------------|------------------------|------|---------------|----------------------------|-----------------------------|
|          |               |     | (% of all)      | treatment-experienced (% of resistant) | naive (% of resistant) | cases (% of resistant) | num. | cluster sizes |                            |                             |
| 14-03-16 | 18809         | L   | 171 (0.9%)      | 117 (68.4%)                            | 25 (14.6%)             | 51.72 (30.2%)          | 43.5 | 1-5           | 120.28 (70.3%)             | 1 (0.6%)                    |
| 17-12-11 | 14035         | L   | 146 (1.0%)      | 101 (69.2%)                            | 20 (13.7%)             | 40.72 (27.9%)          | 33.5 | 1-5           | 106.28 (72.8%)             | 1 (0.7%)                    |
| 17-12-06 | 5374          | L   | 106 (2.0%)      | 79 (74.5%)                             | 9 (8.5%)               | 22.28 (21.0%)          | 19   | 1-5           | 83.72 (79.0%)              |                             |
| 17-12-01 | 338           | L   | 13 (3.8%)       | 10 (76.9%)                             |                        | 2.75 (21.2%)           | 2.5  | 1-2           | 10.25 (78.8%)              |                             |

**Table S41.** DRMs with prevalence > 0.5% found in position RT:S68 in C data set, and the evolution of their presence over time.

| date     | total samples | DRM | resistant cases |                                        |                        | TDR                    |      |               | ADR cases (% of resistant) | loss cases (% of resistant) |
|----------|---------------|-----|-----------------|----------------------------------------|------------------------|------------------------|------|---------------|----------------------------|-----------------------------|
|          |               |     | (% of all)      | treatment-experienced (% of resistant) | naive (% of resistant) | cases (% of resistant) | num. | cluster sizes |                            |                             |
| 14-03-16 | 18809         | G   | 160 (0.9%)      | 51 (31.9%)                             | 87 (54.4%)             | 103.25 (64.5%)         | 77   | 1-12          | 57.75 (36.1%)              | 1 (0.6%)                    |
| 17-12-11 | 14035         | G   | 113 (0.8%)      | 36 (31.9%)                             | 59 (52.2%)             | 71.00 (62.8%)          | 56.5 | 1-10          | 43.00 (38.1%)              | 1 (0.9%)                    |
| 17-12-06 | 5374          | G   | 37 (0.7%)       | 16 (43.2%)                             | 15 (40.5%)             | 19.00 (51.4%)          | 15.5 | 1-4           | 19.00 (51.4%)              | 1 (2.7%)                    |
| 17-12-01 | 338           | G   | 1 (0.3%)        |                                        | 1 (100.0%)             | 1.00 (100.0%)          | 1    | 1-1           |                            |                             |

**Table S42.** DRMs with prevalence > 0.5% found in position RT:T215 in C data set, and the evolution of their presence over time.

| date     | total samples | DRM | resistant cases |                                        |                        | TDR                    |      |               | ADR cases (% of resistant) | loss cases (% of resistant) |
|----------|---------------|-----|-----------------|----------------------------------------|------------------------|------------------------|------|---------------|----------------------------|-----------------------------|
|          |               |     | (% of all)      | treatment-experienced (% of resistant) | naive (% of resistant) | cases (% of resistant) | num. | cluster sizes |                            |                             |
| 14-03-16 | 18809         | Y   | 137 (0.7%)      | 97 (70.8%)                             | 13 (9.5%)              | 37.97 (27.7%)          | 31.5 | 1-5           | 105.03 (76.7%)             | 6 (4.4%)                    |
| 17-12-11 | 14035         | Y   | 125 (0.9%)      | 89 (71.2%)                             | 12 (9.6%)              | 32.97 (26.4%)          | 26   | 1-5           | 96.03 (76.8%)              | 4 (3.2%)                    |
| 17-12-06 | 5374          | Y   | 103 (1.9%)      | 76 (73.8%)                             | 7 (6.8%)               | 20.78 (20.2%)          | 17.5 | 1-5           | 83.22 (80.8%)              | 1 (1.0%)                    |
| 17-12-01 | 338           | Y   | 17 (5.0%)       | 14 (82.4%)                             |                        | 2.75 (16.2%)           | 2.5  | 1-2           | 14.25 (83.8%)              |                             |

**Table S43.** DRMs with prevalence > 0.5% found in position RT:V106 in C data set, and the evolution of their presence over time.

| date     | total samples | DRM | resistant cases |                                        |                        | TDR                    |      |               | ADR cases (% of resistant) | loss cases (% of resistant) |
|----------|---------------|-----|-----------------|----------------------------------------|------------------------|------------------------|------|---------------|----------------------------|-----------------------------|
|          |               |     | (% of all)      | treatment-experienced (% of resistant) | naive (% of resistant) | cases (% of resistant) | num. | cluster sizes |                            |                             |
| 14-03-16 | 18809         | M   | 381 (2.0%)      | 301 (79.0%)                            | 36 (9.4%)              | 71.25 (18.7%)          | 66   | 1-4           | 319.75 (83.9%)             | 10 (2.6%)                   |
| 17-12-11 | 14035         | M   | 285 (2.0%)      | 225 (78.9%)                            | 31 (10.9%)             | 47.25 (16.6%)          | 46   | 1-3           | 238.75 (83.8%)             | 1 (0.4%)                    |
| 17-12-06 | 5374          | M   | 151 (2.8%)      | 122 (80.8%)                            | 11 (7.3%)              | 21.50 (14.2%)          | 21.5 | 1-2           | 130.50 (86.4%)             | 1 (0.7%)                    |
| 17-12-01 | 338           | M   | 8 (2.4%)        | 7 (87.5%)                              |                        | 1.50 (18.8%)           | 1.5  | 1-2           | 6.50 (81.2%)               |                             |

**Table S44.** DRMs with prevalence > 0.5% found in position RT:V108 in C data set, and the evolution of their presence over time.

| date     | total samples | DRM | resistant cases |                                        |                        | TDR                    |              |       | ADR cases (% of resistant) | loss cases (% of resistant) |
|----------|---------------|-----|-----------------|----------------------------------------|------------------------|------------------------|--------------|-------|----------------------------|-----------------------------|
|          |               |     | (% of all)      | treatment-experienced (% of resistant) | naive (% of resistant) | cases (% of resistant) | cluster num. | sizes |                            |                             |
| 14-03-16 | 18809         | I   | 194 (1.0%)      | 114 (58.8%)                            | 55 (28.4%)             | 77.75 (40.1%)          | 72           | 1-3   | 123.25 (63.5%)             | 7 (3.6%)                    |
| 17-12-11 | 14035         | I   | 142 (1.0%)      | 83 (58.5%)                             | 39 (27.5%)             | 53.25 (37.5%)          | 51           | 1-2   | 91.75 (64.6%)              | 3 (2.1%)                    |
| 17-12-06 | 5374          | I   | 70 (1.3%)       | 47 (67.1%)                             | 13 (18.6%)             | 20.00 (28.6%)          | 19           | 1-2   | 51.00 (72.9%)              | 1 (1.4%)                    |
| 17-12-01 | 338           | I   | 3 (0.9%)        | 3 (100.0%)                             |                        |                        |              |       | 3.00 (100.0%)              |                             |

**Table S45.** DRMs with prevalence > 0.5% found in position RT:V179 in C data set, and the evolution of their presence over time.

| date     | total samples | DRM | resistant cases |                                        |                        | TDR                    |              |       | ADR cases (% of resistant) | loss cases (% of resistant) |
|----------|---------------|-----|-----------------|----------------------------------------|------------------------|------------------------|--------------|-------|----------------------------|-----------------------------|
|          |               |     | (% of all)      | treatment-experienced (% of resistant) | naive (% of resistant) | cases (% of resistant) | cluster num. | sizes |                            |                             |
| 14-03-16 | 18809         | D   | 294 (1.6%)      | 99 (33.7%)                             | 159 (54.1%)            | 214.50 (73.0%)         | 139          | 1-19  | 102.50 (34.9%)             | 23 (7.8%)                   |
|          |               | E   | 120 (0.6%)      | 11 (9.2%)                              | 34 (28.3%)             | 108.25 (90.2%)         | 24           | 1-80  | 12.75 (10.6%)              | 1 (0.8%)                    |
| 17-12-11 | 14035         | D   | 213 (1.5%)      | 71 (33.3%)                             | 119 (55.9%)            | 146.50 (68.8%)         | 101          | 1-10  | 78.50 (36.9%)              | 12 (5.6%)                   |
|          |               | E   | 37 (0.3%)       | 5 (13.5%)                              | 19 (51.4%)             | 30.25 (81.8%)          | 15           | 1-15  | 6.75 (18.2%)               |                             |
| 17-12-06 | 5374          | D   | 86 (1.6%)       | 32 (37.2%)                             | 42 (48.8%)             | 50.75 (59.0%)          | 39.5         | 1-5   | 36.25 (42.2%)              | 1 (1.2%)                    |
|          |               | E   | 8 (0.1%)        | 4 (50.0%)                              | 3 (37.5%)              | 3.50 (43.8%)           | 3.5          | 1-1   | 4.50 (56.2%)               |                             |
| 17-12-01 | 338           | D   | 10 (3.0%)       | 4 (40.0%)                              | 3 (30.0%)              | 5.50 (55.0%)           | 5.5          | 1-2   | 4.50 (45.0%)               |                             |
|          |               | E   |                 |                                        |                        |                        |              |       |                            |                             |

**Table S46.** DRMs with prevalence > 0.5% found in position RT:Y181 in C data set, and the evolution of their presence over time.

| date     | total samples | DRM | resistant cases |                                        |                        | TDR                    |              |       | ADR cases (% of resistant) | loss cases (% of resistant) |
|----------|---------------|-----|-----------------|----------------------------------------|------------------------|------------------------|--------------|-------|----------------------------|-----------------------------|
|          |               |     | (% of all)      | treatment-experienced (% of resistant) | naive (% of resistant) | cases (% of resistant) | cluster num. | sizes |                            |                             |
| 14-03-16 | 18809         | C   | 419 (2.2%)      | 299 (71.4%)                            | 56 (13.4%)             | 108.38 (25.9%)         | 98           | 1-4   | 321.62 (76.8%)             | 11 (2.6%)                   |
| 17-12-11 | 14035         | C   | 334 (2.4%)      | 234 (70.1%)                            | 50 (15.0%)             | 80.62 (24.1%)          | 76.5         | 1-3   | 256.38 (76.8%)             | 3 (0.9%)                    |
| 17-12-06 | 5374          | C   | 183 (3.4%)      | 133 (72.7%)                            | 21 (11.5%)             | 38.00 (20.8%)          | 36           | 1-2   | 146.00 (79.8%)             | 1 (0.5%)                    |
| 17-12-01 | 338           | C   | 17 (5.0%)       | 13 (76.5%)                             |                        | 2.00 (11.8%)           | 2            | 1-1   | 15.00 (88.2%)              |                             |
